# Supplementary material for: Bias in logistic regression due to imperfect diagnostic test results and practical correction approaches
Source: Malar J. 2015 Nov 4;14:434. doi: 10.1186/s12936-015-0966-y (PMC4634725; doi:10.1186/s12936-015-0966-y)
Supplement: Supplementary file 4 — 10.1186/s12936-015-0966-y Simulated data used to illustrate Bayesian model 3. [file 12936_2015_966_MOESM4_ESM.csv]

t1	g1	X1	X2	X3	X4
0	0	-1.02652681051104	0.650111780352084	-0.629642839174005	0.596478943545133
0	0	1.492003127629	0.8030712668387	-1.28220723770207	0.358736339525126
1	1	0.185611157452298	0.619439230742444	-0.536831519639031	1.766320102184
0	0	1.19344687049087	0.307614336809247	-1.13354439055544	0.229636032896589
0	0	-0.890595265068351	0.0632201013945226	-1.21836980563505	-0.628063021838604
0	0	-0.163568526407406	-0.239748611896925	1.38114387194363	0.0301510990639035
0	0	-0.353670850094512	-1.5348999380898	0.920015712023453	-1.71291436159909
0	0	-0.694565319831207	-0.787432289054589	-1.66999776650228	1.21473825996555
1	0	-1.14077643555524	1.28367862032114	-1.44334891048055	0.790446201699909
0	0	-1.09850908140152	1.56778774305492	0.807260024806132	-0.539782057515023
1	1	1.4938850695471	-0.000519537699362914	0.483366629983103	-0.736143616051542
1	1	-0.481361918696915	0.840255930548167	1.28480257834197	-1.61979590796682
0	0	0.0262050016349108	0.332039295164011	-0.179032618691735	-0.728107483885872
0	0	-1.59155261781587	-0.493305908589017	-0.486476184773376	-1.07209290391855
0	0	0.717482219029738	1.38588094131041	-1.08020025129785	1.53677550640342
0	0	0.435069493265187	0.821201827540059	-0.52145842445937	-1.28308423296797
0	1	-0.60987030943342	0.269850968420244	1.47626081625064	-0.527947463372217
0	0	-0.303561404699748	-0.133757923225919	0.762193683937658	0.561179536489777
0	0	0.590701927295667	-1.26425963262851	-0.0464289082996733	-1.69687932938266
0	0	-0.987036814892438	0.811349510131984	-0.660477720029071	1.72152475687377
1	1	-0.687582421728898	1.05987354288578	1.05561358631424	0.484001439101359
0	0	0.266596647445748	-0.846610109073694	-1.08792287210508	-1.70173447815071
0	1	1.09975493010514	1.09335161823836	1.54200557572958	1.74313230511783
0	0	-1.27329386038827	0.558088449448533	-0.173809987000153	1.7131145602982
1	0	1.30031371067061	-0.539567812017853	-1.3765081720084	0.488053340623776
0	0	-0.840272531634538	-0.664703104938644	1.37720154165501	0.248887380438774
0	0	0.662597116050769	-0.744397243059084	-1.32993965835394	-0.188224685901365
0	0	-0.956052497180088	0.618348723409747	1.3665988128432	-0.720348061032394
0	0	-0.59166292874596	0.153324576332991	1.34304013568022	-0.454291665043911
0	0	0.131028854954739	0.113503592545125	1.16730077224021	0.44337706148837
0	0	-0.313937026042853	-0.0343678172260493	-0.696701429785096	-0.0308740374434449
1	1	-1.04787110762296	-0.660518376097275	1.202567155343	-1.46686540698312
0	0	0.577968415775203	0.479928689804976	-0.134318827909527	0.245972060552185
0	0	-0.442603632547005	-0.263087290809609	-0.739414002965279	0.271335888578425
0	0	-0.332097222907641	-0.614162964253905	-0.585688589016874	0.54769009269626
0	1	1.49795629754934	0.0347364174503221	-0.248047917984342	-0.13638397166344
0	0	0.877496986638736	1.44269799199018	1.42736508461679	-1.24048461730201
0	0	1.56606191032024	-0.419887631857487	-0.465310372213625	-0.503228613376443
1	1	0.519355248933147	0.584409634274692	1.36416224301387	0.617058834680943
0	0	-1.35096725937761	0.306288053259902	-0.189437285084802	-1.62727046216952
1	0	-1.42393315527915	0.897464930433115	0.21995482540447	0.679703236853569
0	0	-1.38238693133795	0.576713153033031	1.51841192126102	-0.811170714208598
1	0	-0.977259334304541	1.00680787660182	-1.50440364292273	-1.68588974187467
1	1	1.61234331610314	1.42748964792832	1.04983932379592	-0.538945576108419
1	1	-0.522354835017432	0.912909739158191	0.938086011808816	-1.41237458185342
1	1	1.46656344322268	1.32454039587833	1.2364692583117	-1.20159310107272
0	1	-0.027358049901067	-0.684986735271131	1.38897232872728	-1.44780463508361
0	0	1.5349987104396	-0.996673851444359	0.114273987478786	-0.0938588730780304
0	0	0.0750562699909292	0.425184360507923	-0.615581871232593	-1.69314315645488
1	0	-0.455694351268654	-0.725277473881809	-1.68656835090732	0.11478424223343
0	0	0.698825744820627	-0.849401305725619	0.414048811160086	-0.0153758002662133
0	0	-1.37338948576006	-0.379326591116023	1.19517295062861	-0.981636575367089
1	0	-1.46957102906747	1.62001972922965	-1.30892129708244	1.70886179919545
1	1	-1.49971826294148	0.207997059378023	1.16773502894172	-0.887475525759815
0	0	-1.50515718175857	0.930673227957974	-1.45893777174508	0.753294529654492
0	0	0.865738949634152	-0.573627741852388	-0.309331590614526	0.814226400083941
0	0	0.450149357961805	-0.930901156326768	0.893979735250028	1.614953233755
0	0	1.39472555683938	-1.0909968098232	-0.855827024721452	-0.488085738770863
1	1	-0.943671930547602	1.31190134636246	-1.48663834632282	-1.22428869284837
0	0	0.0185560293585196	-1.1823357204551	1.07170381237723	-0.5491084197523
0	0	-0.943430604310388	0.304058579605489	-1.12786914612179	0.441118345165191
0	0	0.899172642658152	-1.18689159769416	0.507707541908619	0.029966002008515
1	1	-1.45819781154011	1.28951208546702	1.40745186337388	-1.51310756767478
0	0	0.639923494353866	0.278871925242195	-0.927410333778809	-1.05748794722676
0	0	0.942511739776179	-0.893525157857729	-0.508452654003336	0.83190259117449
0	0	-1.175253531103	1.16367431489479	0.592832372142838	-1.29811993362455
0	1	0.370415844013892	1.27471386193441	-1.24008783654454	-1.11842926004774
0	0	-0.932451302905499	-1.46173492603011	0.626307179901354	0.649076196372556
0	0	-1.32621755025607	-0.179273600773688	1.20582830250907	1.24432165233562
0	0	-1.01499297705599	-1.39431002368989	-0.78458745058923	1.76746701816894
0	0	1.25848584089536	-1.64377463780301	1.59460554028887	-0.158331389899448
1	1	1.61693030642051	1.24555944856224	0.78811983251201	-0.344703334014292
0	0	-0.342481914614037	0.27433923207878	-0.863721906346004	-1.14102371098772
0	0	-1.58091333599262	-1.18154831686365	-0.793816664115657	1.25265491370678
0	0	-1.28255881365937	1.50725245221947	-1.54142038983527	0.802524074226631
0	0	0.0949330961078085	1.43385738107754	-0.854508298078987	0.108474691159357
0	0	-1.03337195952449	1.3620303952027	-0.0619813670714343	0.523004502067185
0	0	-1.46716425756294	0.456142967634923	-1.56156266938841	0.788432150888861
0	0	0.654855516148441	-0.108170530808308	-1.47585522787677	-1.65286388918632
0	0	-1.34398946847576	-1.5193140416429	1.08275715588968	0.599896382704837
0	0	-0.328944198742414	0.391785067665898	-0.619913662103057	-1.33216987559079
0	0	1.4270011050023	0.750318004699178	-0.178117223887029	0.931540181522119
0	0	-0.925884049137836	1.21359167996103	-0.604352142661211	0.646818927346107
0	0	-0.884348008677627	0.655495815785187	0.743354666278982	-0.807473556497827
0	0	0.248958093094964	-0.160663350583063	-1.3593306470062	1.21081144797423
1	1	-1.12915411233472	0.0288673060710052	0.261857300871937	-0.349833350450104
0	1	0.702298221398916	-0.841197883187874	0.872403684176088	0.743632618988261
0	0	0.663370033291465	0.392085867023494	0.781799140405392	-0.732700203607159
0	1	1.55937988406832	-0.352736802167918	1.00728597938542	0.389391522609737
0	0	-1.2095174916654	-0.962156487908875	0.899601032565157	1.14517920252637
0	1	0.597917569033893	0.639848435641384	0.653322579905937	-1.02263440025614
0	1	1.11896981372441	0.151595981820156	-0.955842911060594	-0.317640369057417
0	0	1.24373197127031	1.59898167938639	-0.979473293823118	1.02017629864064
0	0	-1.59383162891693	1.37236493915314	1.17693503153483	1.43172480756659
0	1	-0.173083434896912	0.0802980448224749	0.536012808128849	0.874467955506327
0	1	0.146520625765714	-1.131149352347	1.51861525826207	-1.11056760112899
0	0	1.6732391541937	0.208573337761493	1.47843405919756	0.732033921202963
0	1	1.27982878371406	1.37057160835209	1.07156810460063	0.857984384080033
0	0	0.712609169057425	-1.24212382445282	0.661830711244543	1.76398902427669
1	1	-0.0215973503997174	1.01316476432715	-0.615115668257444	0.883266795160532
0	NA	0.691547371942797	0.198203545984198	-1.5519590384939	0.0954070050815037
0	NA	0.263108633599508	-0.545341952033677	0.72607286868285	-0.56156861766351
0	NA	-1.08240358618748	-0.91561180983289	-0.0673029689811684	0.432154314477245
0	NA	1.49321287090665	-0.247905731622057	-0.918792398174394	0.310396191316817
0	NA	-1.21152827077375	-0.435946528547194	-0.772422848625357	-1.51629198555632
1	NA	1.12671601683224	-0.0457293370024661	1.35648977397289	0.865544195443336
0	NA	-0.0865136289512845	1.02145092236553	0.241769341332982	0.00112906674920574
0	NA	0.194543045035408	0.628481813870317	1.26239992795661	0.169956502635601
0	NA	-0.847205157012545	-1.39421647702833	-0.788105778421407	-1.57758768930873
0	NA	0.884569939055289	-0.415300564164168	-0.966407846162222	-1.01499715363928
0	NA	-1.04001319078556	-0.32535261679609	-0.701225665705903	-0.460984294422007
0	NA	-0.294798438912201	-0.391017193929894	1.24255314081909	-1.31461605913034
0	NA	1.60130934438602	1.14483459367003	-1.28151679935516	-0.899168800320949
0	NA	-1.39140453903324	1.30966808306466	-1.52533524766053	-0.414205252503824
0	NA	0.557169334536669	1.39740428905835	-1.47963781290045	-0.439716538926516
0	NA	1.13813802601895	-0.141058248885736	0.144747507718699	0.493282616409505
0	NA	-1.14067122892625	0.73677254435945	-0.846463471474604	-0.285200457702379
0	NA	-0.487391580674473	-0.439124932569198	-1.50181127141253	-0.482199418728001
0	NA	-0.0176079125857692	-1.61577249673548	0.826456978307253	0.412717111268521
0	NA	-1.14483643111765	-1.62311586863253	1.56681694766286	0.00412264473446038
0	NA	-0.454887619985706	0.673892708894178	-0.9292462590032	0.766815116346511
0	NA	1.55564456020421	-0.832432873907667	0.342708491888057	1.75596906687161
0	NA	-1.2008610133652	1.3300357150339	1.04457514704822	0.0136841544751508
0	NA	-1.60576019014277	-1.44146834590558	0.527057844317178	0.896629207768685
0	NA	-1.09372372809831	1.55233951998546	-0.498902499282482	1.21788693205714
0	NA	1.04950380183262	1.61267674697423	1.50131184043715	0.219741068428674
0	NA	1.2442846929582	-1.23846991102337	1.14446794616068	0.349180728738241
1	NA	0.0670804855836565	0.60151673389291	0.745403659305871	-1.18647902848515
1	NA	0.441957028100202	0.989574556201682	0.699195972786421	-1.65589875903512
0	NA	1.1631702706957	0.68108342334235	-0.0583958045276246	-0.36932032603074
0	NA	0.574854622052056	-0.0570693738993293	0.923769983997197	-1.03055983048377
0	NA	1.6190028774754	-1.7069644423517	0.155597350557453	1.3241257273494
0	NA	-0.65425995080748	1.56083930761558	0.611405509780384	-0.940249014609055
0	NA	-1.25825698367898	-0.0713026170622346	0.929618850355981	-0.300971071245584
1	NA	0.998613732403059	-1.64163516578842	0.00369376745774994	1.7459174000092
1	NA	1.59563017457249	-1.34088942096876	0.145836993077273	0.52885696187128
1	NA	1.05018479487593	0.952724507803424	1.60990915257427	1.12396045591311
1	NA	-1.61673441758613	1.51858385723939	0.815440870319537	0.649601728516081
0	NA	0.628564881858386	-0.0554710981784901	1.12170011587464	-1.6187003620718
0	NA	1.44633736173922	0.0834669229431748	0.663597111112436	1.26868204270736
1	NA	-0.72600367439001	1.18519594984684	0.022786287008425	0.307885686830187
1	NA	1.0550400759339	-0.00301206248482342	-1.55965657646963	-1.03755307965435
1	NA	0.968783802779542	-0.53893801727225	1.48416052853408	-0.0867396822600703
0	NA	1.64282155175939	0.276718390272182	-0.199587984817347	-0.470411714559968
1	NA	0.397988978510522	0.0847514702161156	0.0268593840129363	-1.49117886509951
1	NA	0.916158250666775	1.63268317238354	-1.63579641282365	0.0099243450777509
0	NA	1.30445350440442	-1.66792589721249	-1.06224489139328	-0.973378523827496
0	NA	-0.776139579520196	-0.084129393367702	-0.744235078512796	0.85489544224971
0	NA	1.21178877377185	1.36060517375396	1.46582187742519	0.187752824233231
0	NA	-0.187875021433164	-0.649955857527822	0.271425434105425	-0.0453146771711433
0	NA	-0.351694734553665	-0.811440208948264	1.20125259308827	0.500257116582736
1	NA	-0.108151449790743	0.170560400320076	0.699816593173387	-0.776890948026411
0	NA	-0.914334174419874	1.40143954770347	-0.180315148204262	0.751586077987152
0	NA	-1.42143036036669	-1.35048802908325	0.410372705994805	0.173963124097584
1	NA	-0.725008244147294	1.54261133889609	-0.695289819693646	-0.664793335394591
1	NA	-1.50031357684152	1.29193530105355	1.40422908586038	1.43108377138699
0	NA	-1.02722001615616	1.04296287763134	-1.18240769570631	1.30677669768456
1	NA	-1.03153680024289	0.00144980833147916	-0.465755561011963	1.17747671695807
0	NA	0.867800947616849	1.14298939351965	1.0358126607126	0.400523551760912
1	NA	-0.683977306354204	1.3760992430621	1.26594996195776	-0.108551249744633
0	NA	1.24091032688354	-1.70953162056193	-1.65065305752886	0.214920272630748
0	NA	0.260979411810474	-1.05479021434488	-1.48554800322699	1.29842078368032
0	NA	-0.476202088635146	-1.274937526556	0.0794887972940868	1.55511725640917
0	NA	-1.5571691888039	0.751099701514788	-0.126561826584213	0.529102471368806
0	NA	-0.308679846880888	0.295578038200391	-0.810986799143926	-0.368557351849324
0	NA	-0.976413790771652	0.114587656049813	-1.03175707681912	-1.2670641046555
1	NA	1.20332901815487	0.87267901253051	0.864562126633175	0.538161839069916
1	NA	1.5850975680752	-0.322197536292034	1.47673925684351	-0.245580688590684
1	NA	-0.565577024629605	-1.41954073385269	0.213920880036012	-1.20289292314406
0	NA	0.793861219821038	1.47005550882242	-1.14719494395737	-0.338223162917567
1	NA	-0.511308910425967	0.756806804842814	-1.42899328701567	-0.793172443492649
0	NA	1.6024935733053	-0.48051258409355	0.668831047796524	-0.504077095149582
1	NA	-0.322240816863544	-0.216478784015601	-1.21741771419005	0.704569008607681
1	NA	-0.378739073982045	0.548325821329526	-0.618708246335428	0.0502130937660699
0	NA	0.220152097257369	-1.60851576312991	1.52655181155743	-1.41532964954935
0	NA	-0.100491957779051	-1.65660522685943	-1.24873767750444	-0.374067803239906
0	NA	-0.22288312127862	-1.42631610227092	-1.35258365484991	1.34653278913877
0	NA	-1.33149255476127	-0.930543074868055	-1.31783773992156	0.455470621735935
0	NA	-1.25750981192318	-0.873367206474218	1.56431876975478	1.74583357063121
0	NA	-0.179430088833608	-1.62579640387307	0.345352752256162	1.29555915118461
0	NA	-0.973232565305596	-0.434097753096172	0.399323383270518	-0.795897759337466
0	NA	-0.220573494802708	-1.41493023108759	-0.843373205489062	-0.59718921401285
1	NA	1.61525831086935	-0.430683319470936	0.635502877595322	-1.68007553786334
0	NA	1.11168739265393	-0.948770978248864	-1.0363789604523	1.61709635335007
0	NA	0.338109364319779	-1.23366965357918	-0.905805108057472	1.59303039110531
1	NA	1.34425299853562	-1.61653375369996	1.35863497485617	-0.269502674895105
0	NA	-0.135123501500232	-0.94869965072221	1.59825632020187	0.376163486624394
1	NA	-1.15090899373372	0.910085407031089	-0.261108003050281	-0.0179838208419803
0	NA	-1.21312849264996	0.4643448841958	-0.167971590285798	-1.23819218546974
0	NA	-1.55847733245958	0.969717681466746	0.901930196859253	-0.870881381676472
0	NA	0.804219434786048	-0.576415561610149	1.11667524241775	-1.22713030386393
0	NA	-0.400784938262829	0.257371909424744	-0.819511964789345	1.19088697329328
0	NA	1.06113552935175	-0.795323515416139	-0.653615996442988	-1.56779934019832
1	NA	1.25701791151227	1.33722414581556	1.38607588511276	1.52774791743567
0	NA	1.52263107761643	-0.869807208630833	0.174777025014847	-0.602003896201727
1	NA	0.248752098295872	1.64784260566332	0.806047347223334	-1.52687966851957
1	NA	-1.51793301571473	0.666653041432829	0.856637367032114	-0.750076082252502
1	NA	-0.825969897509719	0.564301455825098	-0.417615174733824	-0.803631729282616
0	NA	1.60956389984627	-0.623624655963453	-0.963020720476911	-1.15547668282187
0	NA	0.873608142972292	-1.63344739186428	-0.582623263035289	-0.31342678741546
0	NA	0.228282414094886	-1.63533975458868	-1.40881349940741	-1.56306557897148
0	NA	-0.627393292019595	1.05555387054884	-1.32401343737355	0.985087396016064
0	NA	-0.524996074717321	-0.944810616853347	-0.90282500224852	-1.71747925338185
1	NA	1.4116633649456	-0.417693875352882	1.13260427795554	-0.643853390982166
0	NA	-1.56459904540626	1.32167989241792	1.60388421074489	-1.61671732243899
1	NA	1.55934867503069	0.495875475680161	0.200775143226668	-0.443856092153844
1	NA	0.569485413004175	0.558168114031259	1.52219329263666	0.786669865474799
0	NA	1.07475101272796	-1.11987815293567	-0.460939761590841	1.19373837632823
0	NA	-1.02526105963392	-0.279061404188862	-0.397230026605746	-1.39466246690663
1	NA	-0.692694045291103	1.39514835403577	1.34986084305808	1.22223813860867
0	NA	0.449505189016538	1.23212172054873	0.834345237366366	1.3334695750452
0	NA	-0.644002647692317	-0.768817557586764	1.46419372148772	0.134198951361243
0	NA	-0.167337617933864	1.0937559610754	0.0431544965627414	1.3786383668184
1	NA	0.78393277341754	0.401608695816218	0.993653518758152	-1.01705341835573
0	NA	-0.605634305226067	0.842631613839387	1.31698778623889	-0.000132254789860419
1	NA	-0.0514558345843345	0.390203162471391	1.2308473456801	-1.58394835841544
0	NA	-0.672853906451548	-1.06827954397851	0.904280673337883	0.816054574901248
0	NA	-1.03551753254879	0.68406293801923	-1.27478346768767	0.384375527950484
0	NA	1.36028225368992	1.13494511130264	1.1400226838309	0.250772706402049
1	NA	0.948869146120696	1.60779746558509	0.0254434180676504	-1.49507630591119
0	NA	-0.696927926071836	-0.123718148351099	-1.0989709919899	-0.239520118900113
0	NA	1.19401895346983	1.47675922939511	0.920738744386176	-0.23363575921254
0	NA	-1.0684909544942	0.44478605104812	0.169729732267005	0.7817887548053
1	NA	-1.37717913208712	-0.425923188740572	1.31794408453386	1.72139015421248
0	NA	-0.670679880901932	-1.29375253780791	1.36195323141961	0.741017922146513
0	NA	1.14969827901351	1.11702966465593	-0.735430610146	0.49509899413229
1	NA	-1.49105185083877	-0.126532201588462	0.743255578710637	1.67923788414313
0	NA	-0.654667438462951	-0.269834588297094	-0.464438266505065	-0.71630029975433
0	NA	0.521166162346758	-1.64035430696359	-1.63506512348525	0.295243758048117
0	NA	-1.3581701164952	0.90701338951788	0.956779705923511	0.718564725741163
0	NA	1.59826352582366	-1.61577096127652	-1.67340868107881	-1.19029868604158
0	NA	-1.59510163283128	1.18438115819353	-0.0196368218502055	1.20172351811609
0	NA	0.1487116827892	-1.37622599209608	-1.35593577852434	-0.356998001834044
0	NA	-1.30477231965035	-0.352596840343083	0.945624743321147	-1.71284444253147
0	NA	-0.787921249405032	0.944700205676351	-1.07718669373582	1.3325755904255
1	NA	1.33155490039111	-1.62899465890128	0.645394989231495	-0.873476950621837
0	NA	-0.352360617024142	-0.0362705353342431	-0.472673218949416	-0.994675221192137
1	NA	0.996693513149913	1.17132096184792	-0.532297073479483	-0.841007813629919
0	NA	-0.480338198258553	1.47219304378422	-0.0560975064221802	0.5927106446954
0	NA	-1.17970494754903	1.24215973446647	-0.651437495898649	1.41512003317008
0	NA	0.165759419771669	-1.03600531466222	-0.349534555823523	-0.624153408285727
0	NA	1.49787650710793	0.230695300511752	-0.953049354998918	1.69053834529702
0	NA	0.257861075948696	-1.14954146378023	-1.17783306714254	1.18041749219225
0	NA	1.52572981023865	0.508790640875622	0.588241672779096	1.20387229355164
0	NA	0.950105751865937	-0.545869337164957	-0.346966550691018	1.7531580848829
0	NA	-1.24763171631683	-1.38029023402301	-1.06112669538379	1.22669580521788
1	NA	1.13887716477533	-0.991431859908874	0.998487274302727	0.888527366705317
1	NA	0.845017581017319	0.0526166345968775	0.973651060414658	-1.55828841103907
0	NA	-1.29145803123786	-0.346682008621572	-1.53453942699403	-0.596150310270682
0	NA	-0.290136577515268	-1.50110477094098	-0.877920762307063	-1.03974285342865
1	NA	1.59654853919317	-0.435234641329172	0.899745224297418	-0.197759615793691
0	NA	-1.09308876479106	-1.50866903219445	0.1915012401222	1.6200778756788
0	NA	0.0297917822604239	1.14736943560869	-0.243695831706992	0.046063084226415
1	NA	-0.971175908741881	-0.738063930644667	0.119895775811824	-0.0846044488060043
0	NA	-1.04892736356421	0.411243918292134	-0.276792093223558	-1.19578755238369
0	NA	-0.73109827420833	0.503152468260271	-1.22800546077932	-0.41382610304126
0	NA	-1.20667687016778	0.0751271449569485	-1.39107985647771	0.523762490392676
0	NA	1.21052208833965	1.45520843665916	-1.26106739736474	-1.26483372689014
0	NA	0.501597809746588	1.35922780810668	-0.488725215871252	1.63673852142069
0	NA	0.360956857321035	0.83982983471191	-0.192944632181582	-0.313743222583615
1	NA	1.58664231030985	0.181739222791553	0.0808873846023909	1.66531351548606
0	NA	-0.389833347304781	-0.500861338762256	-1.08504360022062	1.03456191182144
0	NA	1.07912600514062	-1.52960984374078	-0.210375154933181	-1.33875620346337
1	NA	-0.887563111571803	1.49614733974599	-0.849507647400209	-0.914093007904807
0	NA	-0.954727623519918	-0.305145526741936	0.350614513288399	1.56924286923721
0	NA	-0.995295761756628	1.67019925698027	1.22032759889483	0.810118083260242
1	NA	-0.841649311364641	-1.69313666393876	-0.646510652314294	0.414155165626202
0	NA	0.100175562018124	-1.17264289555917	1.4877655055863	-0.310726404915707
0	NA	1.10321672152647	-1.12508328867534	0.100293574267835	1.71702617242151
0	NA	0.587005328332677	-0.697133567801269	1.02130211337718	1.74309855545904
0	NA	1.6056796215084	1.01170002413302	1.42877042264929	-0.597322250666554
0	NA	-1.44894341897324	-0.997769263958857	1.06321690443848	0.538683176492188
0	NA	-1.59848113625335	0.114767860126381	-0.943657687888645	1.54842728908135
0	NA	-0.435652534053103	0.160818192928683	-1.0945770966185	0.91825081511823
0	NA	-0.944150765182905	-0.793684766367751	-1.02625106217087	-1.08385843924089
0	NA	-1.13529549731783	1.49906022889066	-0.534738680874626	1.11394889949731
0	NA	-0.308706672244555	1.43950930907844	-1.32938827921248	-0.505952427447631
0	NA	0.622200513890229	-0.486488311463851	0.614611613530093	1.08361643105987
1	NA	1.19506382314456	0.97088897370147	0.853125060345642	-0.770035847394103
1	NA	1.3905511876599	-0.659504961234431	0.640817286401513	1.54606397711138
1	NA	-0.0604878192769727	1.7016585647627	0.887396184117684	1.45043640205525
1	NA	0.72908420002422	-1.61643368990357	0.129435898635345	-1.14146772780185
0	NA	1.11444749322664	-0.672874412718868	-0.29842112559305	1.22200613612983
0	NA	0.603314373351853	-1.28274267000483	-0.36873581190767	1.5902892005294
0	NA	-0.512525981728502	0.351199191055112	0.86908894966249	-0.79595801078817
0	NA	1.31722138729898	-0.609538217656783	1.05684374058319	-0.614893033022261
1	NA	0.115378215192465	1.5056789972285	-1.28431225618113	0.0798630536548197
0	NA	1.26246646884648	1.29234978094759	-1.36270422955291	-1.24393563943746
0	NA	-0.781594701156864	-0.641532820534713	1.49652436410249	1.70669740515155
0	NA	0.160586052188824	-0.436780302680373	-0.750809004613277	0.0226124556349025
0	NA	-0.923211822250865	0.00917462823310559	0.35484781492209	1.19525728090929
0	NA	-0.920823462795357	0.0498936156691934	0.327444432021633	-1.50482113610988
0	NA	-0.066519652607052	-1.03323486304086	0.162279161630472	-1.52613798098332
0	NA	1.32354309348514	-0.24736486361533	-0.723772255366203	-0.901503638760485
0	NA	-0.638635270650658	-0.386123448788312	0.751712665031858	0.334332154604822
0	NA	0.202992162648331	1.66595024284694	0.87576012433028	1.18815472749901
1	NA	0.866983563642875	0.634837816336222	0.322024293008599	-0.545266677911334
0	NA	1.52798042910828	-0.183449665068775	1.1539070227485	-0.512694373868329
0	NA	-0.533564605123931	1.33034098929419	0.0775005167786861	0.566148769642168
1	NA	-1.14834657590824	-0.0540038910508287	1.29820853225364	-0.556385372418485
0	NA	-0.805153613964668	-0.344258422516918	-0.994643744522265	0.514090012834144
1	NA	0.811569681055624	1.68481185412277	-1.58914497967795	-0.480425760651379
1	NA	-1.59465816055404	-0.315991703624331	0.895436634795171	0.334080266431541
0	NA	-0.70469280791314	-1.61155474716003	0.619392225650561	-0.191800282883176
1	NA	0.458836705953328	1.65248711163314	1.22917954390673	-0.482613907436495
0	NA	-1.47119389361297	-0.147400358914231	1.36899671115204	-0.736248248287296
0	NA	-0.454733718322161	1.43393373330797	-1.45572499524728	0.0142723147257503
0	NA	1.04269534628049	0.188462377637164	-1.17077908842814	1.00233594100729
0	NA	0.58959076605067	0.37917717035725	1.59665953459565	0.833286460531411
0	NA	-1.56767103846763	-0.90602849973422	1.27954098561461	0.118644406210351
0	NA	0.648934905693941	-0.115961202536567	-1.62530139141501	-0.192357920621454
0	NA	1.30568340438849	1.38244311962536	0.239361110030924	-1.43633924877578
1	NA	0.143199857081496	0.28129270337728	1.09236705652702	-0.00823336732633523
0	NA	1.29795360739882	-1.52061958573937	-0.906463797001121	0.73215269791844
0	NA	1.17827941811792	0.0560149056640166	1.55089312340004	-0.831175417913652
0	NA	-0.665884938553505	-0.36828774560883	0.117214513075293	0.503311772929242
0	NA	0.963164694169131	-0.0459516247659752	-1.01120347712272	0.796392904100651
0	NA	-0.00124441755890792	-1.19976878279044	0.774728775126353	-0.610018319729542
1	NA	1.62181203484592	1.43445028417074	-0.0771588132316964	1.70945278492703
1	NA	-0.832908158046102	0.73417903625522	-0.831810847026501	-0.261981733206048
1	NA	-1.39797782991845	1.00772995595962	0.968780838297929	-1.06468490585129
0	NA	-0.871235878673144	-0.45421796262764	0.568026188323302	0.500046524338442
0	NA	-0.711028824618777	0.241947878399577	-0.632549472182174	0.0158814720803862
0	NA	1.58325460228271	-0.386093484629504	-1.40888487148535	-0.974839883727963
0	NA	0.547531442773841	1.39548491118065	-1.61760156511053	0.163855088279911
0	NA	0.584437766202812	0.481526315326278	-1.45799124671379	0.113940612156688
0	NA	1.64853294169245	-1.48180509808569	-1.18233556625641	0.63304210571209
0	NA	0.132837583101858	1.04827909789019	-1.05422287318838	-0.945610665194814
0	NA	0.266582660812599	-1.4871855908875	0.0689813205522428	0.854211531937218
1	NA	0.923501698415374	-0.165584756296612	-0.65601775572755	0.558009655809486
0	NA	-0.454798508729517	-1.10175537789568	-0.442235233428489	-0.944246696981012
0	NA	-0.788220417566935	0.45206645478536	0.886769544901135	-0.638927559656813
0	NA	-0.589735226095251	0.893888013059132	0.555929233340815	0.261891856238508
0	NA	0.831218488102841	-1.16304721732666	-1.31158396290171	0.477441805722565
1	NA	0.712912086261595	1.26021497799769	0.438955611960666	1.04932813639712
0	NA	-0.262879031985669	-0.969614502095853	1.37185537186496	-0.374635895664336
0	NA	-1.37187221898074	0.680345006230231	0.0350413551617359	-1.17361801881954
0	NA	-1.11149279395389	1.09101978038798	-0.796402040164737	-0.184474374998569
0	NA	0.0332425004795942	0.736717741940881	1.0678555822738	0.890434001267127
0	NA	1.13332898649861	-0.297045324974309	1.30251932747627	0.343219639557537
0	NA	-0.0220011013808963	0.100606233733306	-1.29128444181173	-1.30576943673068
0	NA	-0.203665321909359	-1.70701995313716	1.47857960508928	1.29252948591242
0	NA	1.28356214570822	-0.855371959786543	-0.141328005872024	-1.31579291870892
0	NA	-0.978932906772447	-1.02165593199746	-1.21226737562101	-0.158204540032719
0	NA	1.34517851184555	1.03500894526151	1.3943655953184	-0.0685589553987202
0	NA	-1.48848386278678	-0.81219345395644	1.50524931150137	-0.228689385217595
0	NA	-1.34280412025479	-0.329561584693725	0.120877776114961	0.445552365547731
0	NA	-0.176624171099402	-0.416433861160264	-0.910207295146385	0.151045843051936
0	NA	0.613111164212918	-1.69383340214502	-1.25216739822127	0.0972618605700938
0	NA	-1.48231091550578	-0.0876995760768731	1.30160643485559	0.711746178295245
0	NA	-0.145855604199021	0.221891703960741	-0.52667564646151	0.155882792470158
1	NA	0.842298095326828	-0.0041641244307915	-1.15807374450007	-0.731071787448963
0	NA	-1.0521995191517	1.27473245716308	-0.839613076042249	-0.6279093002249
1	NA	0.533791059861261	0.0761546801457663	-1.07657576863642	1.72028934845086
0	NA	-1.0954959181568	-1.40139304485569	0.968486940918466	0.202192018290376
0	NA	-0.771446135727408	-1.2575871941436	1.5351757428302	0.30555991920094
0	NA	-1.3248120520892	-1.57089949919889	-0.19404059882214	1.45879524073721
1	NA	-0.330727571768833	0.265178879169337	1.47465074845559	1.40658710583185
0	NA	0.48622964447265	-1.34427738685133	-1.14204451891977	1.27198700983633
0	NA	-0.785038445384419	-1.62579442458918	-0.0188840859921814	1.07728038469859
0	NA	-1.40661374878006	1.02921079726523	-1.40286142509887	-1.1465367073439
0	NA	-1.49244823148944	0.0423067344837932	-0.291523506744957	1.24429595143544
1	NA	0.253064345654957	1.22186543082173	0.239724886361542	1.24398124570557
0	NA	1.14520824588614	0.384768644940661	1.26525011783856	-0.89381073626658
1	NA	1.0655649184352	0.407895828127248	-1.07452995101308	-0.610021986756649
0	NA	1.22100299747658	0.917740784665993	-1.49166159308988	0.866038502566464
0	NA	1.19217984339338	0.195693456249482	-1.67402761301268	-1.59589796304987
0	NA	1.01402040923056	-1.36003797741181	0.419726752332022	1.20210021123966
0	NA	-1.57482673649851	-1.16807090596124	0.0710544043382786	-0.152214594357109
0	NA	-0.433476109889434	1.22103074194705	0.373031620908595	0.210985196412487
0	NA	0.441254946887392	0.911450398170025	1.58147234759741	0.0506204224211927
0	NA	1.40051363439826	-1.64423122369475	0.389948245552416	1.72134482536676
0	NA	-0.151015298986069	-0.273734276354693	-1.03492833064998	1.56835494618893
0	NA	-0.786626637086441	1.07315765727461	-0.973200000385485	-1.27198801790615
0	NA	0.332138895468122	-1.15006264890832	-1.40977206827419	1.14924913346322
0	NA	-0.324003522231595	0.685443458249803	-0.916483137862529	-0.179111560070722
0	NA	1.26003269882664	-1.21647764236359	-1.04486506469665	-0.205481662615672
0	NA	-1.05939888772749	0.963748377207312	0.0750334644649446	0.386598136659525
1	NA	1.04724040607235	-0.957336935634063	-0.252260440913647	0.954262071817662
0	NA	0.996485455991075	-1.31441426395201	-0.642439563387738	-0.222173691117039
0	NA	0.367881037691461	1.53518515819159	-1.56534886833478	0.814712230764145
0	NA	-1.13765387603018	-1.30600837915894	-1.52248707743714	-0.559661613146637
0	NA	-0.974430226618169	-0.0747650706324399	-1.08720630095128	-1.11732231303208
0	NA	-1.29675892577866	-0.458591729813059	0.273675367718923	-1.19152498543906
0	NA	-1.59829903947296	1.39273801176262	-0.23225721516166	-0.640093426284949
0	NA	0.526095252384477	-1.19495548310848	0.159763388141963	0.36109421193604
0	NA	-0.836763780560073	1.20978202780622	-1.60512371997041	1.22313604800438
0	NA	-1.21227075506722	1.38718953401402	-0.783177750526562	-0.602168531896329
0	NA	-1.44670400703449	1.36144556542042	1.10754088181622	-1.61605920002711
0	NA	0.70633779434345	0.0441615999777814	-0.7845580744392	1.52846737433154
0	NA	-1.53890243178992	-0.291787662514444	-1.24563188886784	-0.539341591456409
1	NA	1.28234239751221	-0.112476645369358	0.494600239603267	-1.70563482656526
0	NA	-1.58618346828887	-1.04306143939986	-1.17780085142668	-1.23506286812611
0	NA	0.0530764081790018	-0.589529602604911	-0.643552182174945	1.19643484624829
0	NA	0.498861070731686	1.55148617771475	-1.1934296897326	-0.261688489748352
0	NA	0.672942016118244	0.283309337081798	-0.422950159969728	1.0500549558053
1	NA	0.544003741643464	0.398786691977164	0.254088193175832	1.65412594022473
1	NA	-0.788687511129456	-0.023111236945732	-0.570473185473795	-1.66541878095804
0	NA	1.67227083918906	0.055252396109252	-0.180072823918048	-1.31932142650938
0	NA	0.659574002770573	-0.605060288664906	-0.362126568803691	0.220935717560703
0	NA	-1.47217719164571	0.173770025872051	-1.1367187981727	0.704325378969727
0	NA	-1.30280708097007	-1.65727054353562	0.148751101755894	0.511237444644014
0	NA	-0.0461833137230141	-1.52315269620303	-1.50638416751689	1.74946530890363
0	NA	-0.0819178040351368	-0.387769146047438	-1.03162705203438	0.0893724119279633
0	NA	-0.756565277151298	-1.34147526828145	1.02028905619133	-0.244300997766386
0	NA	0.389714951220437	-1.05898043322891	1.48860544267348	-1.29380527375471
1	NA	0.151200494160505	0.313425819473723	0.266967251673924	0.208820229141509
1	NA	1.22019781064445	0.327322175611105	0.147410300152647	1.34516628896878
1	NA	0.857658906293936	1.38450098283312	1.58299523192024	-1.3847976192201
0	NA	0.876934897756162	-0.193418896481088	0.0187359945431926	0.0565117632827656
0	NA	-0.548155606303933	-0.905308160719031	-0.960189738196445	-1.52973396126946
0	NA	-1.12116796356483	-1.23115250407989	-1.44804565427171	1.37372065905576
0	NA	-1.26576200200831	-1.4612416994821	1.36151383524292	-1.23663126862913
0	NA	-0.990331592278269	-1.64395086657873	0.849298796345246	0.0934490703553358
0	NA	1.20710063042913	-1.29927024263233	-1.3673680542991	-0.67569938867556
0	NA	0.906175262268781	-0.142274817637725	-1.67554331195237	0.606044993569496
1	NA	0.408577309689869	-0.793423361452688	1.25857800050903	-1.26816399162762
0	NA	-1.52469006919189	-0.966395240682357	-0.568221710094947	-1.13499011793248
0	NA	1.67287189801325	-0.348892267923492	-0.451378800615796	-1.35343800917223
1	NA	1.13377058425472	0.777350120567569	1.25178430606449	-1.50795524660757
0	NA	0.307051169603816	-1.15740721204105	1.39411336266137	1.6111912062534
1	NA	-0.514468106983462	1.57904488827577	-0.333731724240869	0.18669235658288
1	NA	-1.08628295057448	1.50956089244828	0.0497832668930722	0.108535716669885
0	NA	1.04026757550128	-0.492650633352247	-1.4145382965037	-0.0993796043408324
1	NA	0.515842084037786	-0.369923980711705	1.31370031943207	0.784367528603897
0	NA	-0.141386127418254	-0.668864838549085	0.19756267786129	-0.162888702075408
0	NA	-1.40057442741442	-1.26781668465365	1.24650212918702	-0.217267790205975
1	NA	-0.435295266558042	1.63951453126876	-0.169078028886908	0.86436630974764
0	NA	0.507846742770854	0.330197385851973	-0.232627350019785	1.39059748133068
0	NA	0.76855179105704	0.843614132272029	-1.04518723806809	-1.22793170539969
0	NA	-0.237745806662215	-1.4719168571532	-0.450120972546638	0.423169258145406
0	NA	0.323276127856438	0.269727142061859	0.31002429090182	-0.0794000917297534
0	NA	1.00869237626174	0.386347746149665	0.103807587936376	0.389174788298311
1	NA	1.17373859899531	-0.0576995399598633	-1.66052633059901	-0.539133300251298
0	NA	-1.63813454759987	0.962325721496942	1.59791482419487	-0.46973730274208
0	NA	-0.644391375449485	0.151043008627932	1.22039638154814	-0.702875858284995
0	NA	-1.38881930615982	-0.862673622498839	0.735662943314073	-1.02031419252299
0	NA	0.243918502935175	-0.866930955361541	-0.27465745540163	-1.17361096771997
0	NA	0.202766240723343	1.11179555200895	0.286339530222052	-1.14778371772019
0	NA	-1.43579923504387	0.296090769937695	-1.58168829988307	1.6990738550029
0	NA	1.39420391200639	1.47903351741515	-0.430368069422897	1.06855096894139
1	NA	1.30707535962329	0.579636708318636	1.04919787066172	0.381483481896248
1	NA	-0.561989403754825	1.15863166848155	0.347486410358395	-1.12683214696173
0	NA	-1.3326662871352	-0.102415396379929	-0.912721196436108	-0.0598613021131115
0	NA	-1.21796335031705	1.37399924118729	1.51872607698941	1.66846028901705
1	NA	1.5239465972229	-1.42031678524708	1.34565329207112	1.32240163105488
1	NA	0.016819928276592	0.327596307225928	-0.681712322962538	0.917019191620201
0	NA	0.53339824216953	1.49865593545603	0.107497746559186	1.55285618294373
0	NA	-0.996943901803994	-1.28498304804731	-0.511722247295063	0.719991962775423
0	NA	0.892347122393218	1.45180345164435	0.442466881796429	0.425214342901158
1	NA	0.177088072394948	-1.6342320201555	1.29151764892992	0.654363333943209
0	NA	-0.930413368363166	1.09966666132069	1.37858761341093	-0.879803960322526
0	NA	0.656331772270353	1.09030599994189	0.968534955675959	1.12441359964061
0	NA	1.58940686876437	-1.39108468498244	-1.34507390188662	-1.30199030673503
0	NA	0.206066855793132	-1.51390041974043	0.148250204814123	-0.83300761263828
0	NA	0.112884928160392	0.365894636048904	-0.900546069240872	-1.29136069363411
1	NA	-0.921243720384487	-0.492544384692129	1.22784896026263	0.106982063144827
0	NA	0.619142161931721	-0.992281451580053	0.976143683489638	-1.52108995146797
0	NA	0.836441584992109	0.398334024015713	0.24863171960961	-1.6233343964231
0	NA	-0.0991832158226057	-0.509659787103453	-0.165402174634867	-1.64870491047238
1	NA	-1.18410808251464	1.17179415970039	1.10955971584378	-1.21614481269353
0	NA	1.06340620753	-0.785949091480472	1.2734785866848	0.342553929407963
0	NA	1.12244132560069	1.57583075993264	-1.27143345014036	-0.430674917685193
0	NA	-0.464025959209966	-1.69209078531423	-1.68814351937291	0.463799811975225
0	NA	1.60905938465793	-0.0205234794420631	-1.27344903696458	-0.694201172297543
0	NA	1.63994266684069	-0.677877772259347	-1.09485424225806	-0.310903592250542
1	NA	0.466733261889026	-1.37601113381846	1.56400440711947	-1.22773596258246
1	NA	1.4876121565663	-1.23255725221134	0.822973559841064	1.11000136433086
0	NA	-1.55623549253284	0.179970848178617	1.55576711153149	-1.52046164824724
0	NA	-0.0257571199583206	0.314887066438962	-1.63062392594995	-0.682512680320321
0	NA	-0.751067097957445	-1.08365712557744	1.18392489844238	-0.71191601922018
1	NA	0.896408219478354	1.30514704329368	-0.209696937991139	1.13995705508358
0	NA	-0.0199945482548328	-0.114141474909222	0.445249532010659	-0.317926685818012
0	NA	0.83936488949118	1.56620455260079	0.585424771749625	1.28384151325314
1	NA	-1.49901817992955	1.51503231517724	1.1725225570031	-0.813091945327087
1	NA	-0.177400991209047	-0.640986249736214	-0.339602200019872	-0.77605709289421
0	NA	-1.15539742366239	-1.32699738276188	0.74879508989033	0.102655098000431
0	NA	-0.697076382734613	-1.55307527490976	-0.506869867039757	-1.44870328845489
0	NA	-1.39590374455968	0.926688303203234	-0.886855185974937	-0.928510501454978
0	NA	0.635029929003871	0.087617268499961	-1.56196981973966	0.411316391474845
1	NA	0.998463122939722	0.590242681093663	1.29631902276988	-0.846691349513034
1	NA	-1.55870478724041	1.54454661558674	0.339743694102831	-1.4210996443372
0	NA	-0.716313532572959	-1.13376166364813	-0.472957536847419	-0.465278206724069
0	NA	1.15160862862301	0.538515880835635	0.347572453526453	-1.39354531238359
0	NA	-0.0885312003966205	1.04474820125696	0.231964624708197	-0.55997723603983
0	NA	0.883567618304786	-1.15898086942256	-1.50206296981737	0.977915108109155
0	NA	0.942063880732982	-0.307413460973861	0.676212604167526	-0.864529524004966
0	NA	-0.00182965697072895	-0.16068805896228	-0.312058851538146	-1.10455333924215
0	NA	0.956041643725916	0.515792446063475	-0.513019474147094	0.496607217988713
0	NA	1.38687993763362	-0.0824020928794355	-1.06306378187794	1.30067894466436
0	NA	-0.690841372184629	-0.0425275345620764	-0.610672775320692	0.877607322618266
1	NA	0.379457483456615	1.42503705463746	-0.732376920362397	1.21768754010074
0	NA	0.155786325753266	-1.36032756560827	-0.541299615845632	-1.55776163405774
0	NA	1.66788078876746	-0.378764868915325	-0.0842543663397686	-0.718256379826655
1	NA	0.387669993214592	-1.12019653158516	1.50475956051172	-0.432798142641844
0	NA	-0.941835200533243	-0.976315424260728	0.0366881466185043	1.13234820556688
1	NA	-0.585916048137106	-0.273798964037301	0.956013490234225	-0.210642121068087
0	NA	1.36712263639519	1.65250764471141	0.225950119325488	-1.06404301105071
0	NA	-0.566399485657107	0.186599226083145	0.387288569846923	-1.48988969204237
0	NA	0.2218734588057	-1.10512487364924	1.09858216665861	1.30510254451045
